# Supplementary material for: Mass spectrometry of planetary exospheres at high relative velocity: direct comparison of open- and closed-source measurements
Source: Copernicus journal article supplement (doi:10.5194/gi-6-1-2017), 2017-01-10
Supplement: Supplementary file 1 [file gi-6-1-2017-supplement.zip]

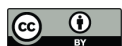

## *Supplement of*

# **Mass spectrometry of planetary exospheres at high relative velocity: direct comparison of open- and closed-source measurements**

**Stefan Meyer et al.**

*Correspondence to:* Stefan Meyer ([stefan.meyer@space.unibe.ch](mailto:stefan.meyer@space.unibe.ch))

- [gi-6-1-2017-supplement-title-page.pdf](#)
- [EionPlotData\\_Fig8.txt](#)
- [MeasSpectBGCorr\\_NIMProto\\_Fig9.txt](#)
- [RotPlotData\\_Fig7.txt](#)
- [SpeedPlotData\\_Fig6.txt](#)

The copyright of individual parts of the supplement might differ from the CC-BY 3.0 licence.
